# Supplementary material for: Transforming Growth Factor β‐Activated Kinase 1 Regulates Mesenchymal Stem Cell Proliferation Through Stabilization of Yap1/Taz Proteins
Source: PubMed Central journal article supplement — Stem Cells. 2019 Nov 18;37(12):1595–605. doi: 10.1002/stem.3083 (PMC6916189; doi:10.1002/stem.3083), 2019-11-18
Supplement: STEM-37-1595-s011.pdf [file STEM-37-1595-s011.pdf]

Supporting Information Table S1. Primer sequences used in this study.

|                 | Forward                 | Reverse                 |
|-----------------|-------------------------|-------------------------|
| <i>Gapdh</i>    | TGGAGTCTACTGGTGTCTTC    | TCTCGTGGTTCACACCCATC    |
| <i>Sirt1</i>    | ATACCTTGGAGCAGGTTGCAG   | ACGAACAGCTTCACAATCAAC   |
| <i>Sod1</i>     | AACCATCCACTTCGAGCAG     | ATACTGATGGACGTGGAACC    |
| <i>Dicer1</i>   | TCTCAGGAGTGACGCTGAG     | TCTGTCAGTAAACGGTCCACAG  |
| <i>Ezh1</i>     | ATTGCGTCCATGTTTCCTGAG   | TCTGACATCTCTGTCAGCTCTC  |
| <i>Bmi-1</i>    | TTTATGCAGCTCACCCGTC     | CTCCTCATCTGCAACTTCTCC   |
| <i>Foxo1</i>    | AGTGGATGGTGAAGAGCGTGC   | TCTGCACTCGAATAAACTTGCTG |
| <i>Foxo3</i>    | TGTCCTATGCCGACCTGATCAC  | ACAGGTTGTGCCGGATGGAG    |
| <i>p21</i>      | AACATCTCAGGGCCGAAAAC    | ACTTCAGGGTTTTCTCTTGC    |
| <i>p57ki2a</i>  | AGGACGAGAATCAAGAGCAG    | AGTTCTCTTGCGCTTGGC      |
| <i>p16ink4a</i> | AGAGAGGATCTTGAGAAGAGG   | AGTTGAGCAGAAGAGCTGCTAC  |
| <i>Pcna</i>     | AGACACCTTAGCACTAGTATTCG | AAGTTGCTCCCACTCAAGTCC   |
| <i>Cdk2</i>     | AGACTTTGGACTAGCAAGAGC   | AGTAGTACTTGCAGCCCAGAAG  |
| <i>Cdk4</i>     | TGACTTTGGCCTAGCTAGAATC  | TTGCGTATGTAGACTGCAGAAG  |
| <i>Cdk6</i>     | TAGTGTAAGCTTGGTTTCTCTG  | TGCTGAGGCACCTGGAGACC    |
| <i>Erk1</i>     | TACACGCAGCTGCAGTACATC   | TGCGCTGACAGTAGGTTTGATGC |
| <i>Erk2</i>     | ACATGAGAACATCATTGGCATC  | TGCTGTGTCTTCAAGAGCTTG   |
| <i>Smad2</i>    | AGTGTGTGTAAATCCGTACC    | TGGAGTGGGTGTAGTCATCCAG  |
| <i>Smad3</i>    | AGGATGAAGTGTGTGTAATCC   | AATGGCTGTAGTCATCCAGTG   |
