# Supplementary material for: Transforming Growth Factor β‐Activated Kinase 1 Regulates Mesenchymal Stem Cell Proliferation Through Stabilization of Yap1/Taz Proteins
Source: PubMed Central journal article supplement — Stem Cells. 2019 Nov 18;37(12):1595–605. doi: 10.1002/stem.3083 (PMC6916189; doi:10.1002/stem.3083), 2019-11-18
Supplement: STEM-37-1595-s012.pdf [file STEM-37-1595-s012.pdf]

Supporting Information Table S2. Antibodies used in WB of this study.

| Antibody                                    | Company                        | Dilution                                               |
|---------------------------------------------|--------------------------------|--------------------------------------------------------|
| TAK1 (#4505)                                | Cell Signalling Technology     | 1/ 1,000 in Immuno-enhancer                            |
| Phospho-TAK1<br>(Thr184 / 187) (#4531)      | Cell Signalling Technology     | 1/ 1,000 in Immuno-enhancer                            |
| YAP1 (G-6, sc-376830)                       | Santa Cruz Biotechnology, Inc. | 1/ 1,000 in Immuno-enhancer                            |
| Phospho-YAP1<br>(Ser397) (D1E7Y,<br>#13619) | Cell Signalling Technology     | 1/ 1,000 in Immuno-enhancer                            |
| TAZ (M2-616,<br>560235)                     | BD biosciences                 | 1/ 1,000 in Immuno-enhancer                            |
| $\alpha$ Tubulin (B-7, sc-<br>5286)         | Santa Cruz Biotechnology, Inc. | 1/ 1,000 in Immuno-enhancer                            |
| TBP (#8515)                                 | Cell Signalling Technology     | 1/ 1,000 in Immuno-enhancer                            |
| HA (F-7, sc-7392)                           | Santa Cruz Biotechnology, Inc. | 1/ 5,000 in 0.2% Twenn-TBS<br>containing 10% Block Ace |
| Ub (P4D1, sc-8017)                          | Santa Cruz Biotechnology, Inc. | 1/ 1,000 in Immuno-enhancer                            |
| Caspase-3 (#9662)                           | Cell Signalling Technology     | 1/ 1,000 in Immuno-enhancer                            |
| Gapdh (FL-335, sc-<br>25778)                | Santa Cruz Biotechnology, Inc. | 1/ 5,000 in 0.2% Twenn-TBS<br>containing 10% Block Ace |
